# Supplementary material
Source: MDPI journal article supplement (https://www.mdpi.com/2077-0472/11/5/381)
Supplement: s1 [file s1]

## SUPPLEMENTARY MATERIAL

Table S1. Total rainfall and mean temperature recorded in the experimental years at the reference weather station of Passo Rolle (2004 m a.s.l.).

| YEAR                             | 2002 | 2003 | 2004 | 2005 | 2006 | 2007 | 2008 | 2009 | 2010 | 2011 | Year mean |
|----------------------------------|------|------|------|------|------|------|------|------|------|------|-----------|
| <b>Total rainfall (mm)</b>       |      |      |      |      |      |      |      |      |      |      |           |
| January                          | 6    | 30   | 9    | 7    | 25   | 83   | 65   | 99   | 31   | 27   | 38        |
| February                         | 43   | 4    | 82   | 9    | 56   | 24   | 35   | 23   | 54   | 41   | 37        |
| March                            | 65   | 8    | 91   | 41   | 65   | 155  | 83   | 192  | 62   | 72   | 83        |
| April                            | 153  | 76   | 90   | 78   | 150  | 102  | 144  | 162  | 34   | 28   | 102       |
| May                              | 282  | 121  | 133  | 110  | 115  | 157  | 247  | 38   | 208  | 161  | 157       |
| June                             | 143  | 119  | 102  | 144  | 54   | 132  | 222  | 138  | 132  | 257  | 144       |
| July                             | 149  | 139  | 148  | 127  | 147  | 137  | 169  | 155  | 100  | 100  | 137       |
| August                           | 172  | 153  | 120  | 139  | 241  | 261  | 165  | 110  | 169  | 102  | 163       |
| September                        | 119  | 115  | 73   | 117  | 104  | 93   | 124  | 135  | 152  | 219  | 125       |
| October                          | 106  | 216  | 216  | 217  | 96   | 160  | 220  | 180  | 146  | 144  | 170       |
| November                         | 575  | 185  | 87   | 45   | 202  | 126  | 182  | 99   | 228  | 192  | 192       |
| December                         | 66   | 72   | 50   | 53   | 114  | 4    | 74   | 136  | 162  | 12   | 74        |
| Total                            | 1880 | 1239 | 1202 | 1089 | 1369 | 1434 | 1732 | 1466 | 1478 | 1358 | 1424      |
| <b>Mean air temperature (°C)</b> |      |      |      |      |      |      |      |      |      |      |           |
| January                          | -2.7 | -5.7 | -6.0 | -4.2 | -4.2 | -0.9 | -2.3 | -4.2 | -7.1 | -5.0 | -4.2      |
| February                         | -2.1 | -7.8 | -3.2 | -8.1 | -4.9 | -1.8 | -1.5 | -3.9 | -6.4 | -2.7 | -4.2      |
| March                            | -0.5 | -0.7 | -2.8 | -2.3 | -3.9 | -1.2 | -2.2 | -2.6 | -3.9 | -1.6 | -2.2      |
| April                            | 0.0  | -0.7 | 0.7  | 0.9  | 1.4  | 0.7  | -0.1 | 0.5  | 0.8  | 3.1  | 0.7       |
| May                              | 5.0  | 7.1  | 3.4  | 6.5  | 5.5  | 5.7  | 5.8  | 7.7  | 4.0  | 6.6  | 5.7       |
| June                             | 10.6 | 12.8 | 9.1  | 9.9  | 9.8  | 9.5  | 9.8  | 9.0  | 9.4  | 9.4  | 9.9       |
| July                             | 10.7 | 12.0 | 10.6 | 10.2 | 12.2 | 11.2 | 10.9 | 11.5 | 12.7 | 9.9  | 11.2      |
| August                           | 9.6  | 14.2 | 11.0 | 9.2  | 7.9  | 10.5 | 11.5 | 12.6 | 10.4 | 12.8 | 11.0      |
| September                        | 5.4  | 6.6  | 8.2  | 7.8  | 10.1 | 6.2  | 6.3  | 8.6  | 6.5  | 10.5 | 7.6       |
| October                          | 3.4  | 1.1  | 5.1  | 5.1  | 6.5  | 3.1  | 4.8  | 5.1  | 2.3  | 4.3  | 4.1       |
| November                         | -0.3 | 1.3  | 0.0  | -1.5 | -1.4 | -1.6 | 0.4  | 0.8  | -1.5 | -0.4 | -0.4      |
| December                         | -2.8 | -2.7 | -1.8 | -5.7 | 0.0  | -3.2 | -3.6 | -5.9 | -6.8 | -3.3 | -3.6      |
| Mean                             | 3.0  | 3.1  | 2.9  | 2.3  | 3.2  | 3.2  | 3.3  | 3.3  | 1.7  | 3.6  | 3.0       |

Table S2. Soil characteristics of the experimental area, the surrounding vegetation, and the donor site of the ski slope restoration experiment (soil layer 0-10 cm). na means not available.

| Site                               | Receptor          |                                                        |                  |                                             | Donor           |
|------------------------------------|-------------------|--------------------------------------------------------|------------------|---------------------------------------------|-----------------|
| Soil trait (1)                     | Experimental area | Not sown ski slope area close to the experimental area | Nardion strictae | Rhododendro ferruginei - Vaccinion myrtilli | Nardo-Agrostion |
| % gravel                           | 66.0              | 64.5                                                   | 49.5             | 48.2                                        | 6.4             |
| % fine earth                       | 34.0              | 35.5                                                   | 50.5             | 51.8                                        | 93.6            |
| % sand                             | 71.3              | 72.1                                                   | 65.0             | 67.5                                        | 61.6            |
| % silt                             | 22.7              | 21.9                                                   | 27.6             | 25.2                                        | 26.8            |
| % clay                             | 6.1               | 6.0                                                    | 7.4              | 7.3                                         | 11.6            |
| % organic matter in the fine earth | 0.03              | 0.06                                                   | 20.5             | 16.8                                        | 7.6             |
| % roots                            | 0                 | 0                                                      | 14.2             | 7.4                                         | na              |
| pH (in water)                      | 4.8               | 4.7                                                    | 4.8              | 4.5                                         | 4.8             |
| Total N %                          | 0.0025            | na                                                     | na               | na                                          | na              |
| Plant-available P mg/kg            | 8.2               | na                                                     | na               | na                                          | na              |
| Exchangeable K mg/kg               | 74.2              | na                                                     | na               | na                                          | na              |

(1) Methods of soil analysis. Soil fractions larger (gravel) and smaller (fine earth) than 2 mm separated by sieving. Fine earth analysed according to the official Italian methods of soil analysis (G. U., 1997 and 1999) for sand, silt and clay content (hydrometer, method II.6), organic matter content (Springer-Klee method, VII.2); pH (in water, III.1); total N (Kjeldhal method, XIV.3); assimilable P (Olsen method, XV.3); exchangeable K (ammonium acetate method, X.1). References. G.U., 1997. Approvazione dei "Metodi ufficiali di analisi fisica del suolo". Decreto Ministeriale 1/8/1997. Gazzetta Ufficiale dello Stato Italiano, Serie Generale n. 204 del 2/9/1997 - Suppl. Ordinario n. 173. G.U., 1999. Approvazione dei "Metodi ufficiali di analisi chimica del suolo". Decreto Ministeriale 13/09/1999. Gazzetta Ufficiale dello Stato Italiano, Serie Generale n. 248 del 21/10/1999 - Suppl. Ordinario n. 185.

Legend. (1) Species origin: D, from the donor grassland; DRn, from the donor grassland and the Nardus stricture grassland at the receptor site; Ro, from other vegetation at the receptor site; C, from the cultivar mixture. (2) Survey code. First letter, type of propagation material: G, green hay at high sowing rate; S, hay-flower from seed-stripping; g, green hay at low sowing rate; D, dry hay (low sowing density); N, not sown; C, cultivar mixture. Second letter, type of fertilisation: C, continuous in the first four years; I, initial, in the first two years; D, delayed, in the third and fourth year; N, no fertilisation. Number, 1, 3, 5, 7, 8 and 9: number of years after sowing; NA, NANA (donor grassland); NNA and NND, not sown site slope vegetation; Nara and Nardum stricte vegetation at the receptor site; RNa and RNdendroideae ferruginei-Vaccinium myrtillus vegetation at the receptor site; Mx, cultivar seed mixture (in this case, percent values are the species contribution in seed weight).

Table S4. Effect of four propagation materials and four fertilisation treatments on the main traits of a ski slope grassland restoration experiment.

| Propagation material (1)<br>Fertilisation (2)          | G      | S      | g      | D      |            |            |            |            | Factor main and interaction effect (3) |     |      |     |      |       |
|--------------------------------------------------------|--------|--------|--------|--------|------------|------------|------------|------------|----------------------------------------|-----|------|-----|------|-------|
|                                                        | Mean   | Mean   | Mean   | Mean   | Mean<br>CF | Mean<br>IF | Mean<br>DF | Mean<br>NF | PM                                     | F   | PMxF | Y   | PMxY | F x Y |
| Cover stones diam.>5cm %                               | 13.9   | 15.5   | 9.7    | 11.6   | 11.6b      | 11.8b      | 13.2ab     | 14.1a      | ns                                     | *** | ***  | *** | ns   | **    |
| Cover earth+stones<5cm %                               | 13.4   | 10.1   | 16.0   | 13.9   | 9.3b       | 10.8b      | 15.7a      | 17.8a      | ns                                     | *** | *    | *** | *    | ***   |
| Cover litter %                                         | 2.7ab  | 4.7a   | 0.4b   | 2.0ab  | 2.5        | 2.2        | 1.9        | 3.2        | *                                      | ns  | ns   | *** | ***  | ns    |
| Cover biological soil crust %                          | 5.3    | 6.0    | 6.0    | 7.3    | 4.6b       | 6.9a       | 6.1a       | 7.0a       | ns                                     | *** | **   | *** | **   | ns    |
| Cover vascular plants %                                | 66.3   | 65.7   | 69.7   | 67.5   | 73.7a      | 70.1b      | 65.2c      | 60.2d      | ns                                     | *** | **   | *** | *    | ***   |
| Cover grasses %                                        | 57.0   | 58.8   | 60.8   | 57.8   | 65.0a      | 61.2b      | 57.2c      | 51.0d      | ns                                     | *** | ***  | *** | **   | ***   |
| Cover forbs %                                          | 9.4    | 6.9    | 8.9    | 9.6    | 8.7        | 8.8        | 8.0        | 9.3        | ns                                     | ns  | ***  | *** | **   | ns    |
| No. species total                                      | 17.3b  | 20.0ab | 18.4ab | 21.7a  | 18.8b      | 17.6c      | 19.4b      | 21.6a      | *                                      | *** | **   | *** | **   | ns    |
| No. species from donor grassland                       | 3.90ab | 3.35b  | 4.47ab | 4.71a  | 4.17a      | 3.44b      | 4.28a      | 4.54a      | *                                      | *** | *    | *** | ns   | ns    |
| No. sp. donor gr. and receptor site <i>Nardion</i> gr. | 9.7    | 10.2   | 9.9    | 11.1   | 9.8b       | 9.6b       | 10.0b      | 11.6a      | ns                                     | *** | ***  | *** | ns   | ns    |
| No. species from receptor site                         | 3.67   | 6.46   | 4.01   | 5.85   | 4.90ab     | 4.50b      | 5.14ab     | 5.44a      | ns                                     | *** | ***  | *** | ns   | ns    |
| No. species from sowing mixture                        | 0.01   | 0      | 0.01   | 0      | 0.01       | 0.01       | 0          | 0          | ns                                     | ns  | ns   | ns  | ns   | ns    |
| Van der Maarel coeff. vs. donor grassland              | 0.50   | 0.41   | 0.34   | 0.48   | 0.44       | 0.46       | 0.42       | 0.42       | ns                                     | ns  | **   | *** | ***  | ns    |
| Jaccard coefficient vs. donor grassland                | 0.28b  | 0.28b  | 0.31ab | 0.33a  | 0.30b      | 0.28c      | 0.29b      | 0.31a      | *                                      | *** | *    | *** | ns   | ns    |
| Jaccard coefficient vs. <i>Nardion</i> grassland       | 0.22b  | 0.34a  | 0.21b  | 0.29ab | 0.27b      | 0.25b      | 0.27ab     | 0.28a      | *                                      | *** | ns   | *** | ***  | ns    |

Legend. 1) G and g, green hay, high and low sowing rate, respectively; S, hay flower form seed stripping; D, dry hay. 2) CF, IF, DF and NF, continuous, initial, delayed and no fertilisation, respectively. 3) PM, propagation material; F, Fertilisation; Y, year; ns, not significant; \* 0.05≥p>0.01; \*\* 0.01≥p>0.001; \*\*\* 0.001≥ p.

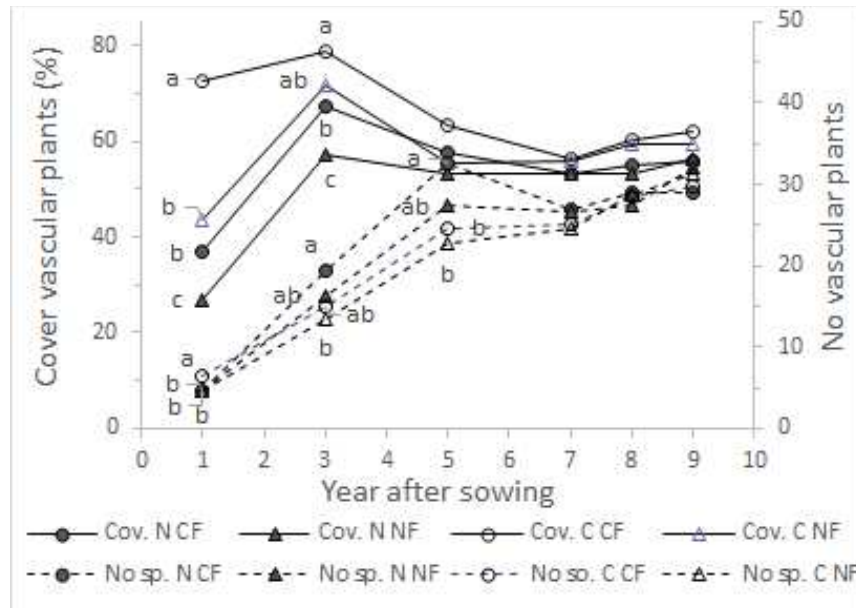

Fig. S1. Time pattern of the vascular plant cover and number at a ski slope grassland restoration experiment. Data show the results from four treatments obtained by combining two propagation materials (N, no sowing; C, cultivar mixture) combined with two fertilisation levels (with, CF, and without, NF, fertilisation in the first four years after sowing). Letters show results of among-treatment comparisons within each year. Means with common letters do not differ at  $p \leq 0.05$ . Missing letters means not significant treatment effect.

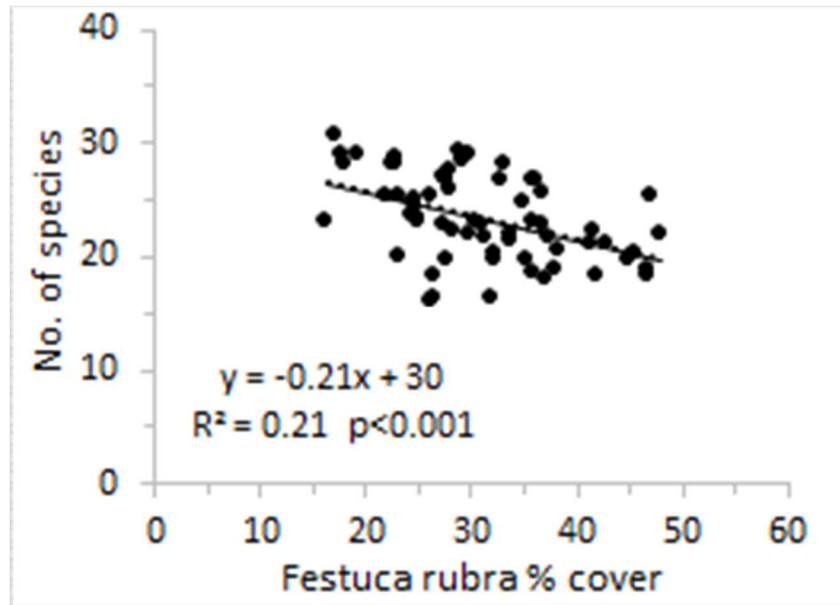

Fig. S2. Relationship between *Festuca rubra* cover and total number of species of the vegetation obtained with four types of propagation material from a *Nardo-Agrostion* donor grassland and four fertilisation levels at a ski slope grassland restoration experiment. Data refer to 7-11 years after sowing.
